# Supplementary material for: Cryo-EM structures of apo-APC/C and APC/CCDH1:EMI1 complexes provide insights into APC/C regulation
Source: PubMed Central journal article supplement (PMC11579458; doi:10.1038/s41467-024-54398-5), 2024-11-21
Supplement: 41467_2024_54398_MOESM1_ESM.pdf [file 41467_2024_54398_MOESM1_ESM.pdf]

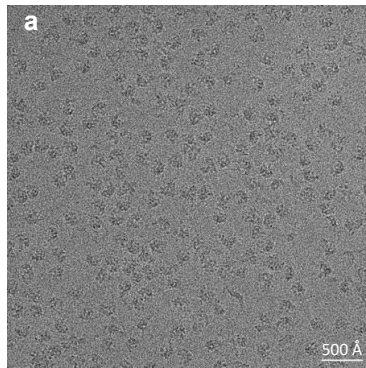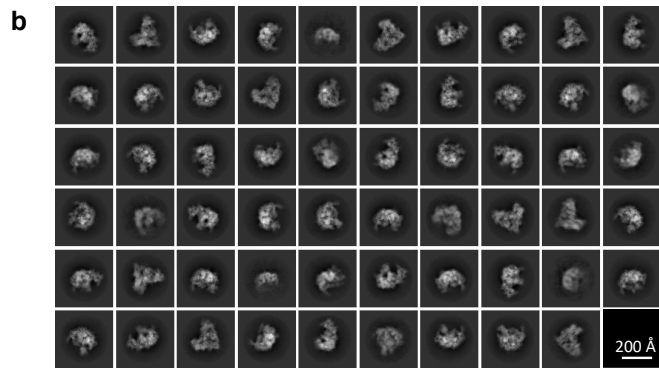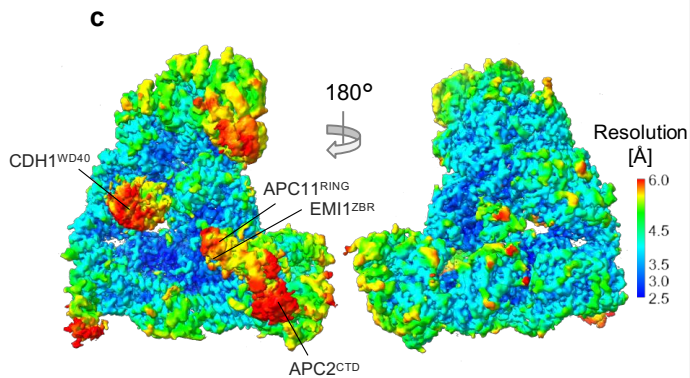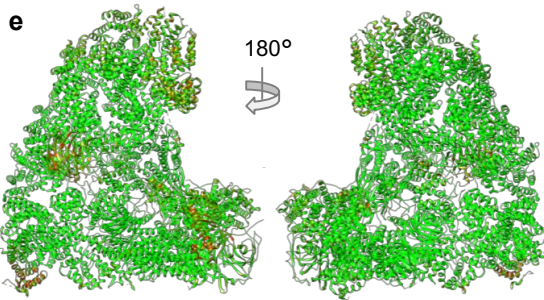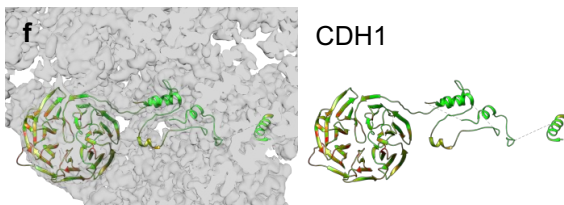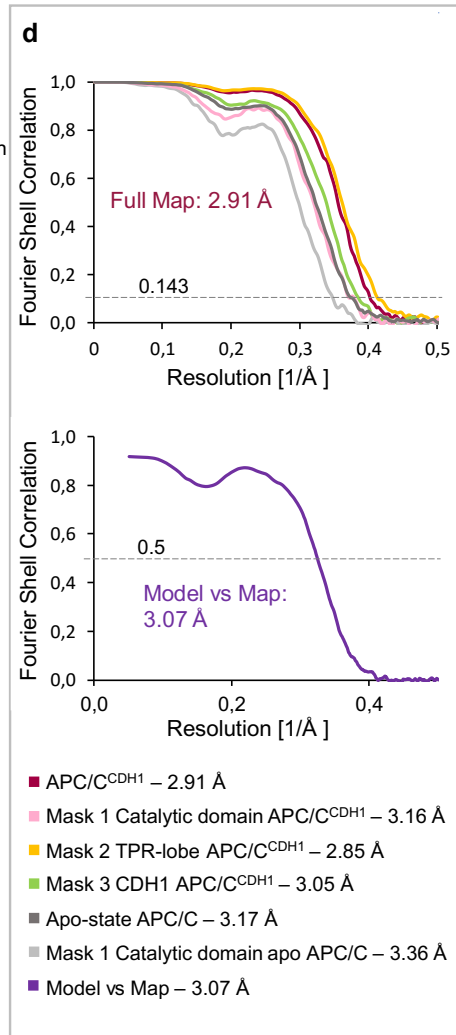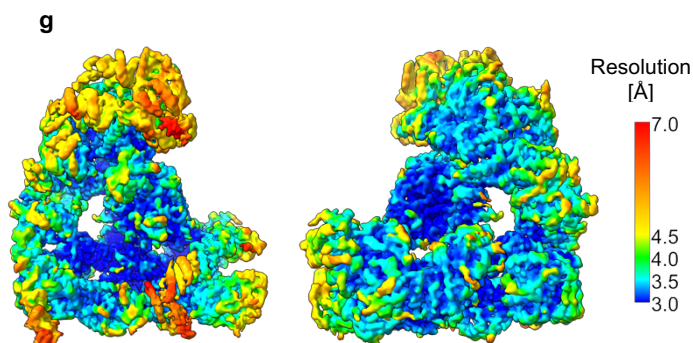

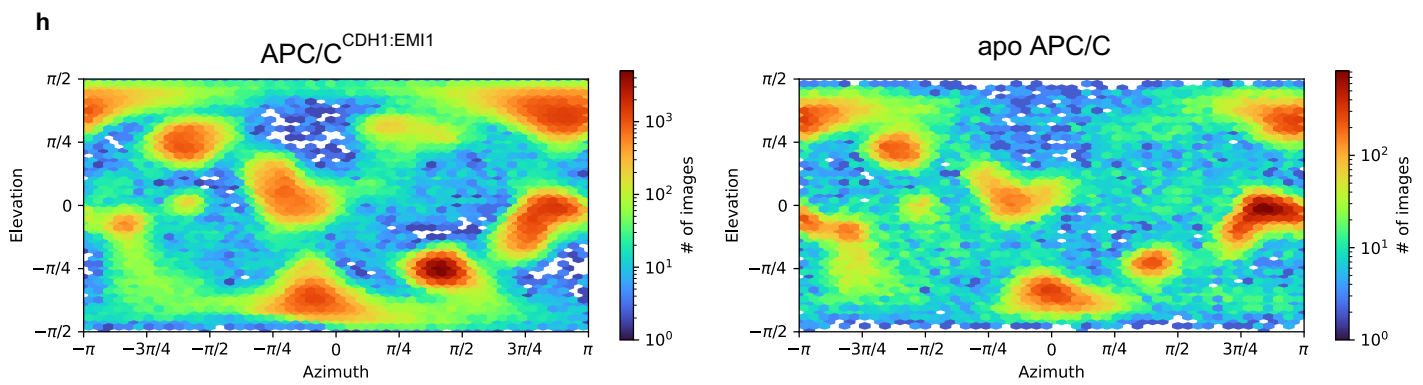

**Supplementary Figure 1. Cryo-EM images and refined APC/C reconstructions.** **a**, Representative cryo-EM image of the APC/C<sup>CDH1:EMI1</sup> complex (from a total of 8,296 images). **b**, Gallery of 2D-class averages of APC/C<sup>CDH1:EMI1</sup>. **c**, Local resolution map of APC/C<sup>CDH1:EMI1</sup>. **d**, Fourier Shell Correlation (FSC) plots of the main maps used to generate molecular models. **e**, Q-score analysis<sup>1</sup> of the APC/C<sup>CDH1:EMI1</sup> complex to validate map-model correlation. **f**, Close-up view on the CDH1 subunit of the APC/C<sup>CDH1:EMI1</sup> complex that is colour-coded by Q-score. **g**, Local resolution map of apo APC/C. **h**, Plots of angular distribution of particles used in final reconstructions: left panel – APC/C<sup>CDH1:EMI1</sup>; right panel – apo APC/C.

**a**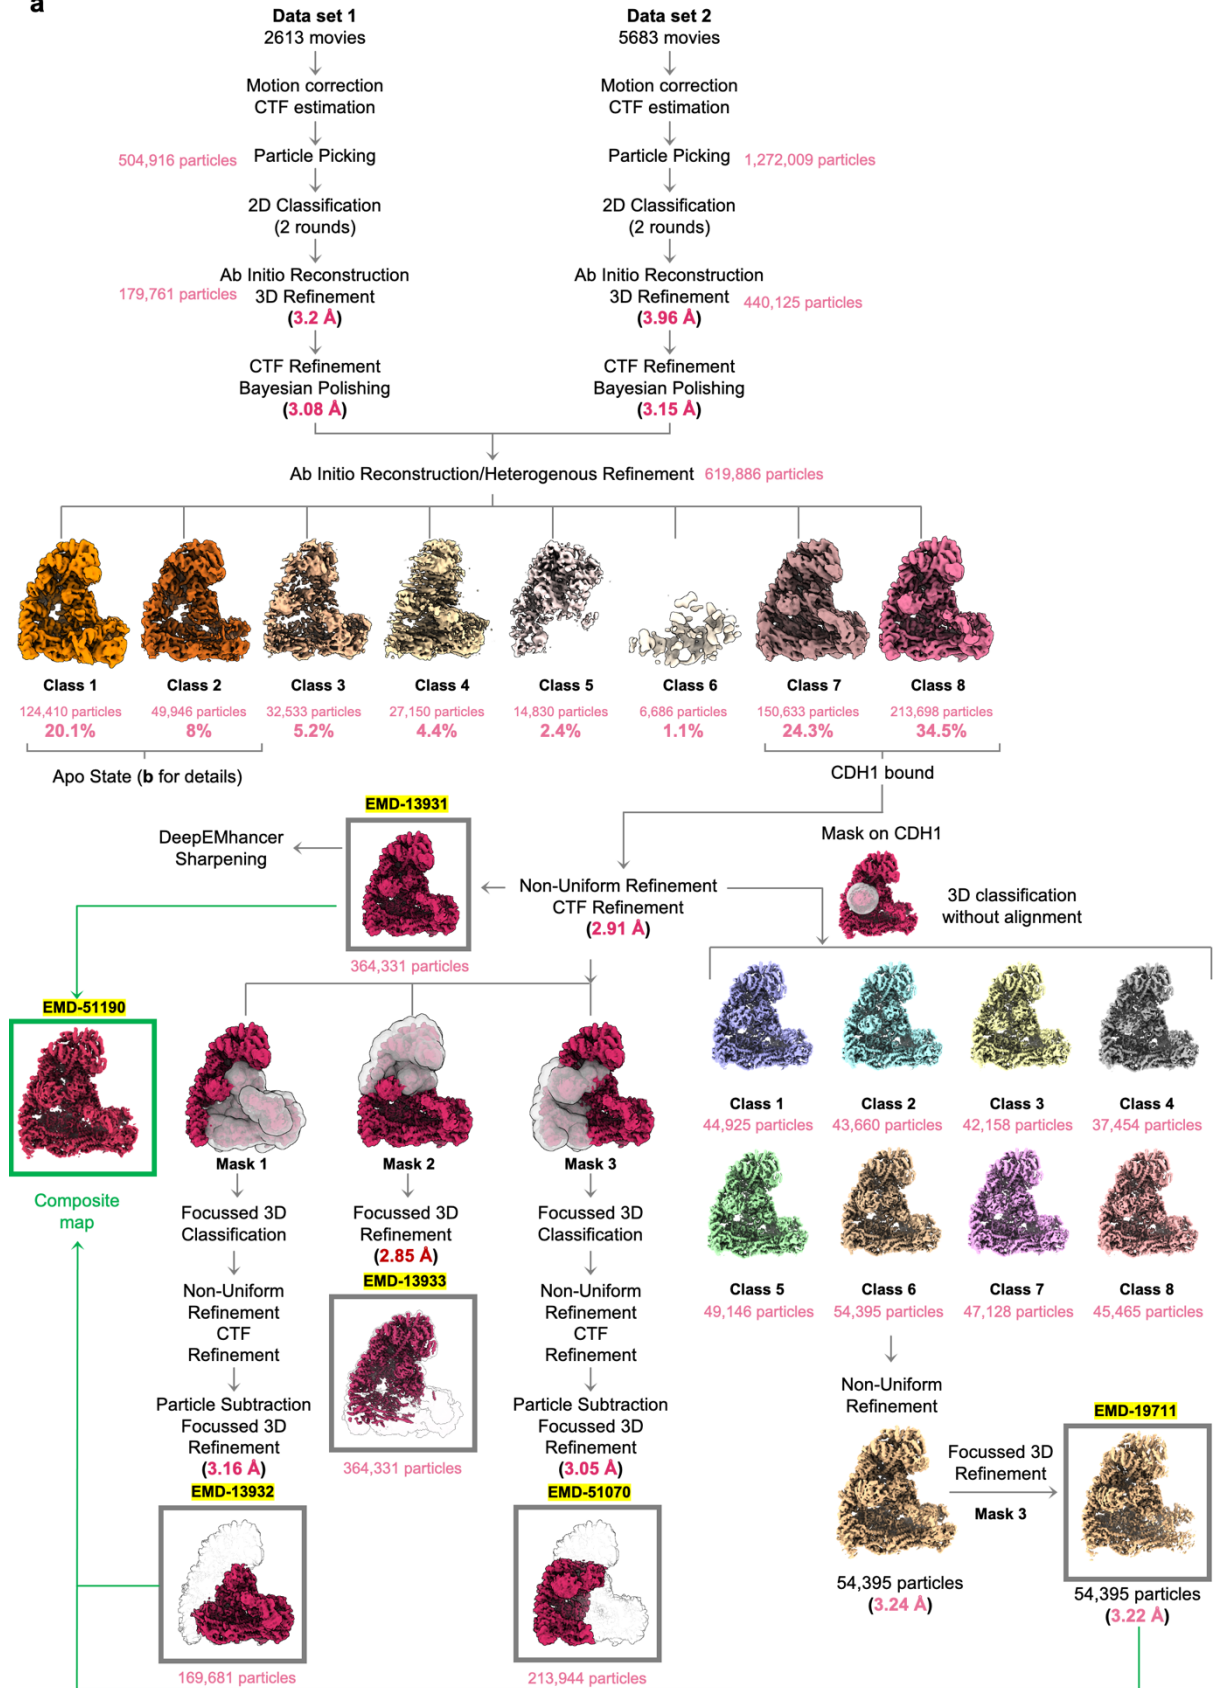

**b**

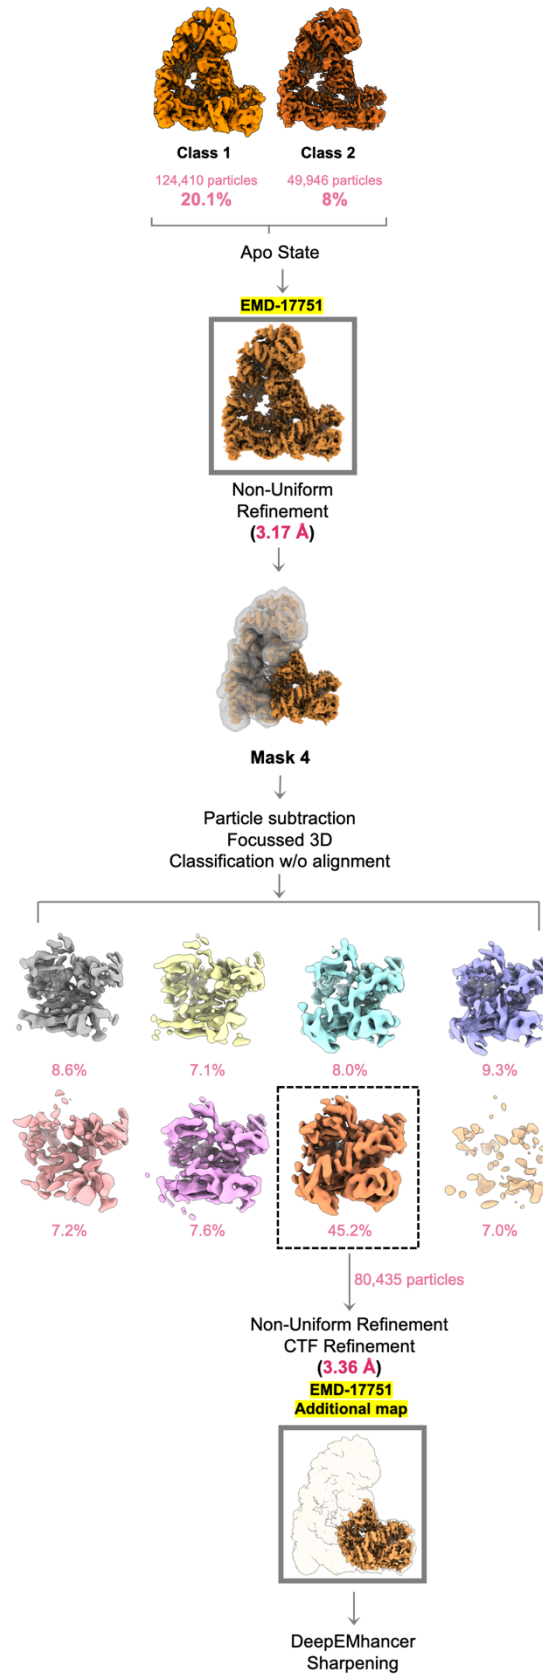

**Supplementary Figure 2. Data processing pipeline for cryo-EM reconstructions. (a)** Cryo-EM data processing workflow summary as described in the Methods section for the ternary APC/C<sup>CDH1:EM1</sup> complex. **(b)** Work flow for apo-APC/C.



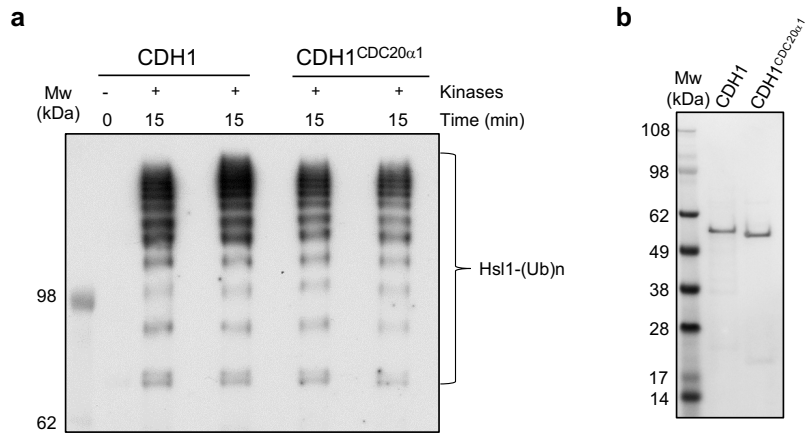

**Supplementary Figure 3. CDH1 and CDH1<sup>CDC20 $\alpha$ 1</sup> activate unphosphorylated and phosphorylated APC/C to similar extents. a**, Ubiquitination assay with unphosphorylated and phosphorylated APC/C activated by CDH1 and CDH1<sup>CDC20 $\alpha$ 1</sup>. **b**, SDS PAGE gel of CDH1 and CDH1<sup>CDC20 $\alpha$ 1</sup> used in the ubiquitination assay. These experiments were performed in triplicate. Source data are provided as a Source Data file.

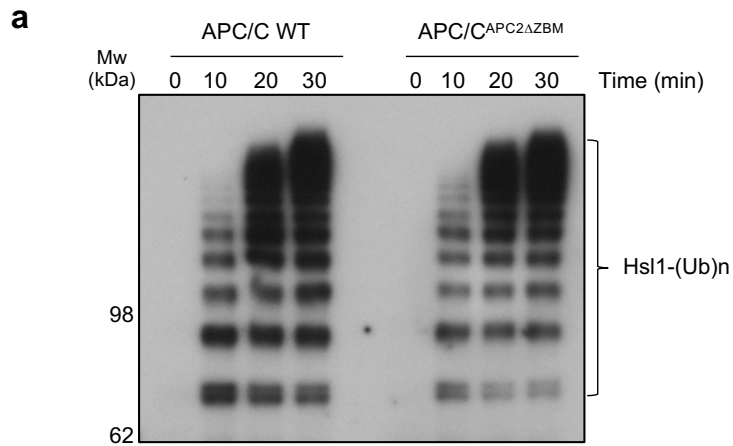

Ubiquitylation activity of APC/C WT and APC/C<sup>APC2 $\Delta$ ZBM</sup>

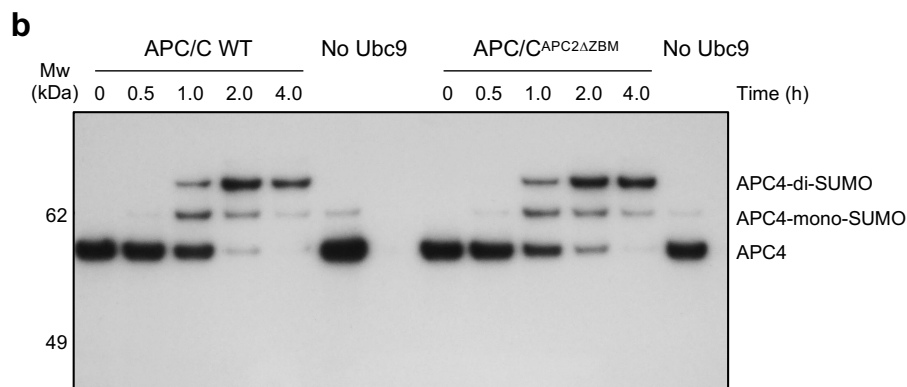

SUMOylation of APC/C WT and APC/C<sup>APC2 $\Delta$ ZBM</sup> (anti-APC4 WB)

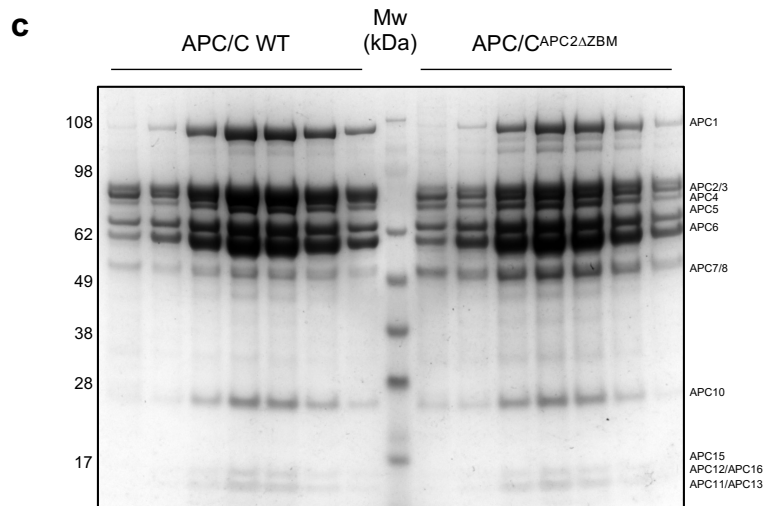

**Supplementary Figure 4. Wild type APC/C and the APC/C<sup>APC2 $\Delta$ ZBM</sup> mutant have similar ubiquitination activity and are SUMOylated to the same extent. a**, A ubiquitylation assay shows wild type APC/C and the APC/C<sup>APC2 $\Delta$ ZBM</sup> mutant (disrupted APC2<sup>ZBM</sup>) are equally active as E3 ligases. **b**, SUMOylation assays shows that wild type APC/C and the APC/C<sup>APC2 $\Delta$ ZBM</sup> mutant are SUMOylated to the same extent. APC4 SUMOylation is shown by a Western blot against APC4. **c**, SDS PAGE gel comparing wild type APC/C and mutant APC/C<sup>APC2 $\Delta$ ZBM</sup>. The mutant APC2<sup>ZBM</sup> did not impair APC/C assembly. These experiments were performed in triplicate. Source data are provided as a Source Data file.

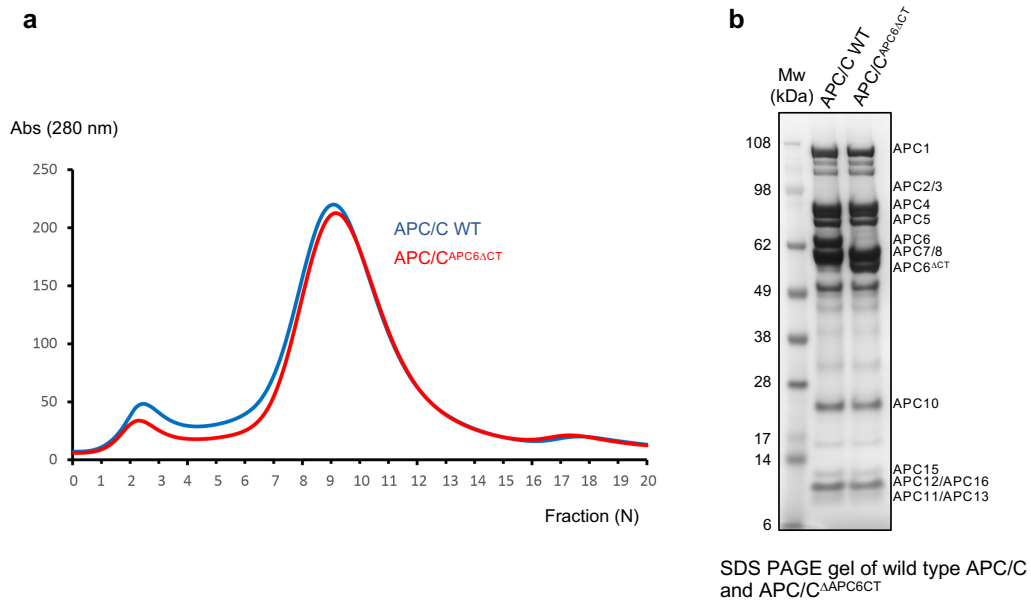

**Supplementary Figure 5. APC/C<sup>APC6ΔCT</sup> assembles normally.** **a**, Size exclusion chromatogram and **b**, SDS PAGE gel of wild type APC/C and APC/C<sup>APC6ΔCT</sup> show similar elution profiles on a SEC column (a), and subunit stoichiometry (b). These experiments were performed in triplicate. Source data are provided as a Source Data file.

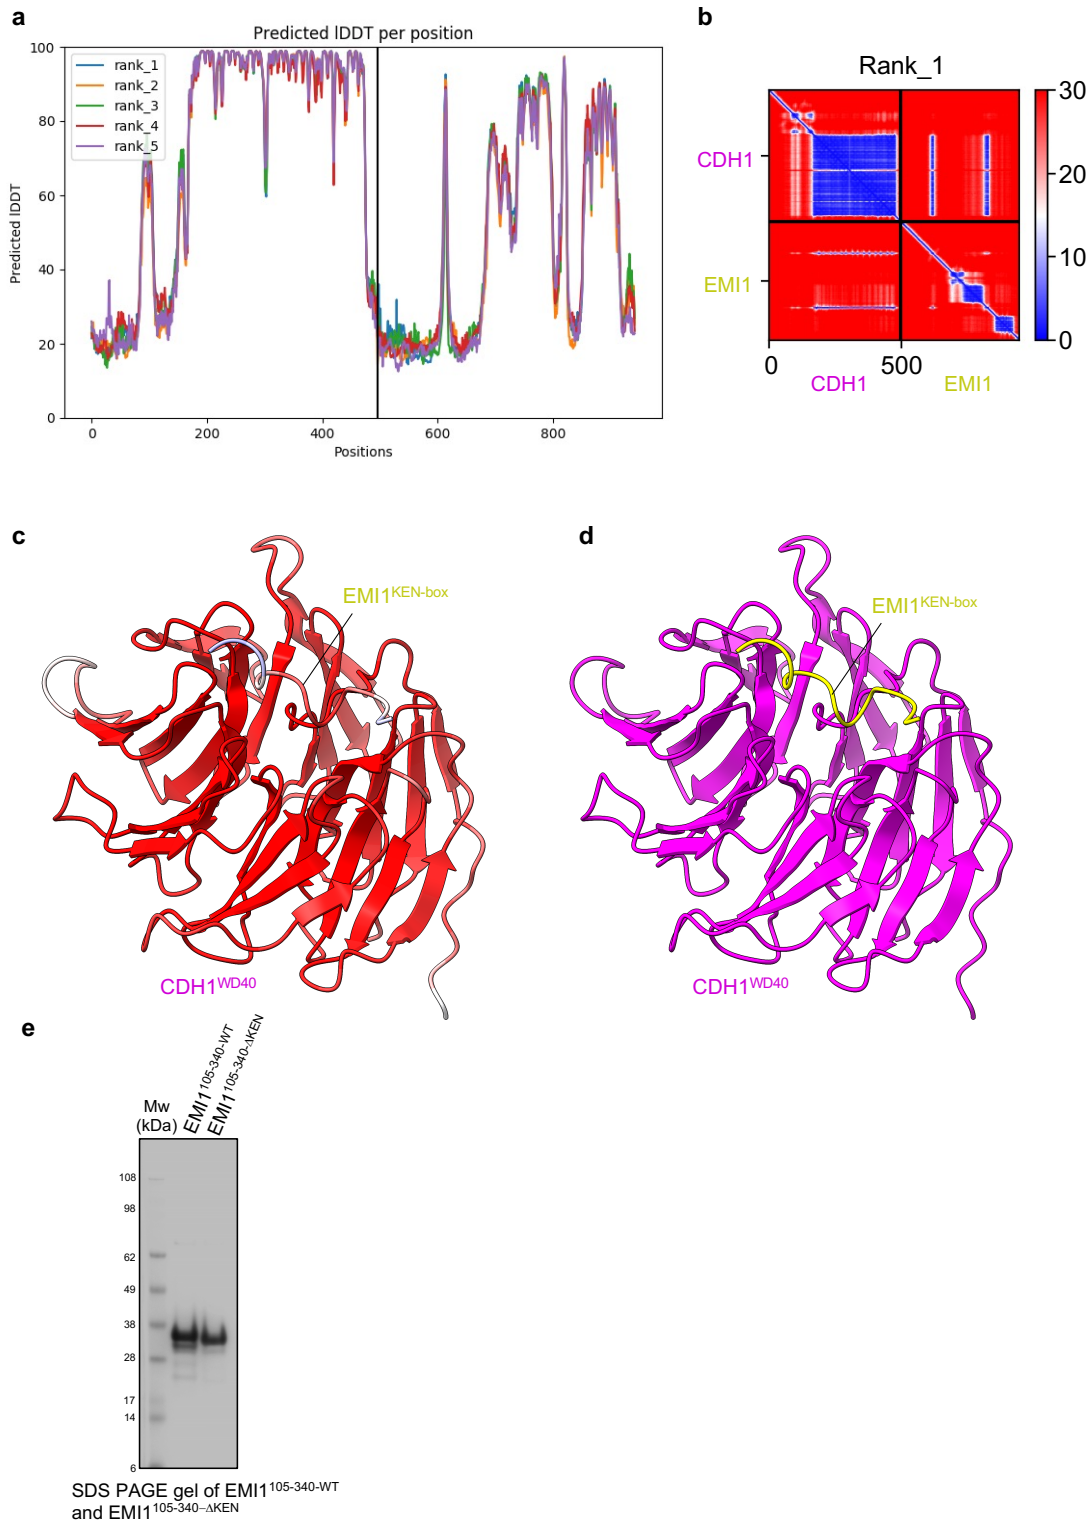

**Supplementary Figure 6. AlphaFold2 prediction of the CDH1<sup>WD40</sup>:EMI1<sup>KEN box</sup> interaction and confidence metrics.** **a**, Predicted local distance difference test (IDDT) values for the AlphaFold2 models of CDH1<sup>WD40</sup>:EMI1<sup>KEN box</sup>. A higher score indicates higher confidence in the prediction. **b**, The predicted alignment error (PAE) heat map for the CDH1<sup>WD40</sup>:EMI1<sup>KEN box</sup> AlphaFold2 prediction. The PAE heat map shows the predicted error (in angstroms) between all pairs of residues, with blue indicating lower error and red indicating higher error. The PAE plot suggests high confidence for the predicted interactions between CDH1<sup>WD40</sup> and EMI1<sup>KEN box</sup>. **c**, The pLDDT values mapped onto the predicted model of CDH1<sup>WD40</sup>:EMI1<sup>KEN box</sup>. Residues are coloured in a scale of high (red) to low (blue) pLDDT values. The model was predicted with high confidence (pLDDT > 90). **d**, Predicted model colour-coded according to Fig. 1c. **e**, SDS PAGE gel of EMI1<sup>105-340-WT</sup> and EMI1<sup>105-340-ΔKEN</sup>. This experiment was performed in triplicate. Source data are provided as a Source Data file.



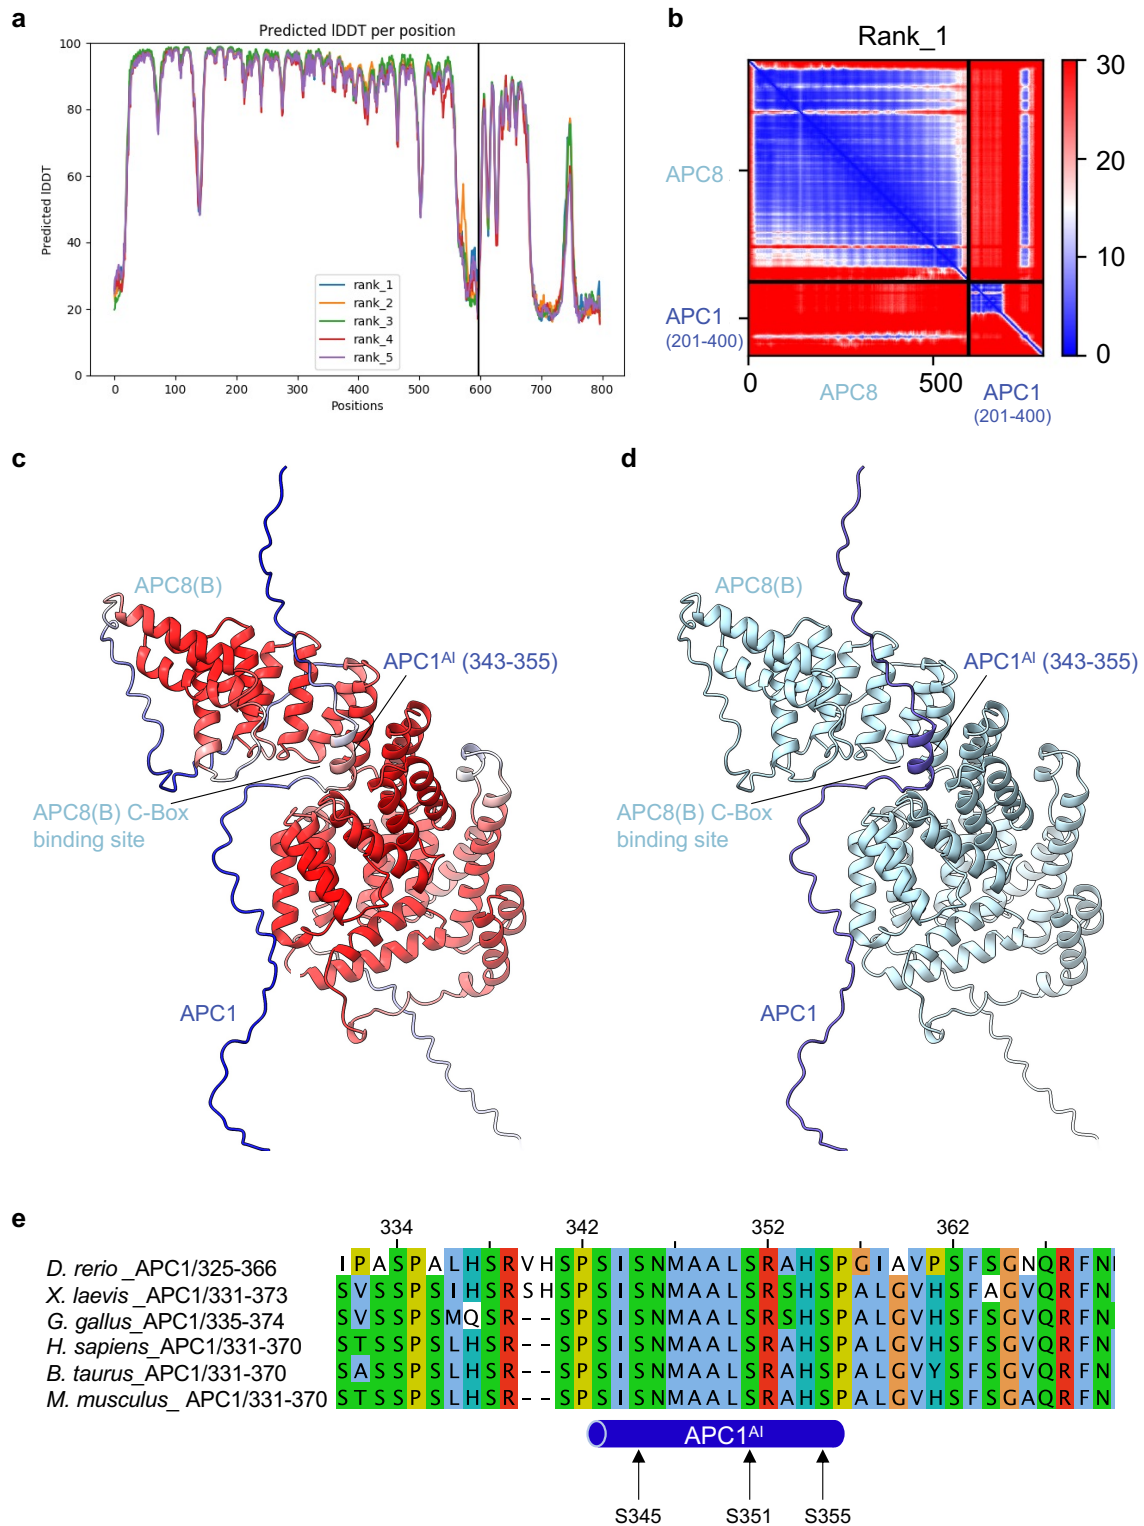

**Supplementary Figure 7. AlphaFold2 prediction of the APC1<sup>AI</sup>:APC8 interaction and confidence metrics.** **a**, Predicted local distance difference test (IDDT) values for the AlphaFold2 models of APC1<sup>AI</sup>:APC8. A higher score indicates higher confidence in the prediction. **b**, The predicted alignment error (PAE) heat map for the APC1<sup>AI</sup>:APC8 AlphaFold2 prediction. The PAE heat map shows the predicted error (in angstroms) between all pairs of residues, with blue indicating lower error and red indicating higher error. The PAE plot suggests high confidence for the predicted interactions between APC1<sup>AI</sup> and APC8. **c**, The pLDDT values mapped onto the predicted model of APC1<sup>AI</sup>:APC8. Residues are coloured in a scale of high (red) to low (blue) pLDDT values. The model was predicted with high confidence (pLDDT > 90). **d**, Predicted model colour-coded according to Fig. 1c. **e**, MSA of APC1 comprising the AI segment of selected vertebrate species. Sites of phosphorylation are indicated (Ser345, Ser351, Ser355).

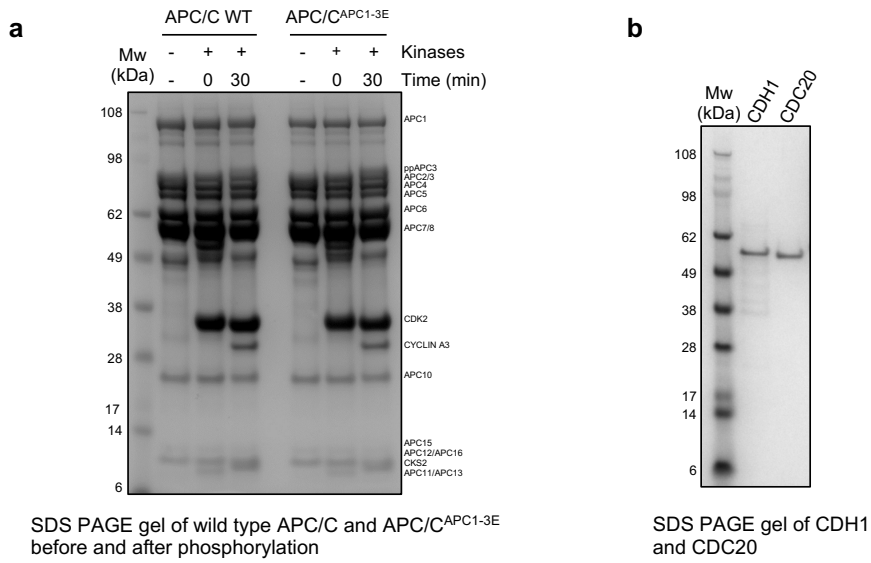

**Supplementary Figure 8. SDS PAGE gels of purified APC/C complexes and coactivator.** **a**, SDS PAGE gel of unphosphorylated and phosphorylated wild type APC/C and APC/C<sup>APC1-3E</sup> mutant. The slower migrating phosphorylated APC3 subunit (ppAPC3) indicates APC/C phosphorylation. **b**, SDS PAGE gel of CDH1 and CDC20 used in this assay. These experiments were performed in triplicate. Source data are provided as a Source Data file.

**Supplementary Table 1. Cryo-EM data collection, refinement and validation statistics**

|                                                  | APC/C <sup>CDH1:EMI1</sup> Dataset 1 |                                             |                                             |                                                                | APC/C <sup>CDH1:EMI1</sup> Dataset 2                   |                                                    |                                                          |
|--------------------------------------------------|--------------------------------------|---------------------------------------------|---------------------------------------------|----------------------------------------------------------------|--------------------------------------------------------|----------------------------------------------------|----------------------------------------------------------|
| <b>Data collection</b>                           |                                      |                                             |                                             |                                                                |                                                        |                                                    |                                                          |
| Microscope                                       | FEI Titan Krios                      |                                             |                                             |                                                                | FEI Titan Krios                                        |                                                    |                                                          |
| Voltage (keV)                                    | 300                                  |                                             |                                             |                                                                | 300                                                    |                                                    |                                                          |
| Electron dose (e <sup>-</sup> /Å <sup>-2</sup> ) | 40                                   |                                             |                                             |                                                                | 40                                                     |                                                    |                                                          |
| Detector                                         | FEI Falcon III                       |                                             |                                             |                                                                | FEI Falcon III                                         |                                                    |                                                          |
| Pixel size (Å/pixel)                             | 1.07                                 |                                             |                                             |                                                                | 1.07                                                   |                                                    |                                                          |
| Defocus range (μm)                               | 1.5-3.5                              |                                             |                                             |                                                                | 1.5-3.5                                                |                                                    |                                                          |
| Micrographs (N)                                  | 2,613                                |                                             |                                             |                                                                | 5,683                                                  |                                                    |                                                          |
| <b>Reconstructions</b>                           |                                      |                                             |                                             |                                                                |                                                        |                                                    |                                                          |
|                                                  | APC/C <sup>apo</sup>                 | APC/C <sup>CDH1:EMI1</sup><br>Composite map | APC/C <sup>CDH1:EMI1</sup><br>Consensus map | APC/C <sup>CDH1:EMI1</sup><br>Focussed Map<br>Catalytic domain | APC/C <sup>CDH1:EMI1</sup><br>Focussed Map<br>TPR lobe | APC/C <sup>CDH1:EMI1</sup><br>Focussed Map<br>CDH1 | APC/C <sup>CDH1:EMI1</sup><br>Improved CDH1<br>occupancy |
|                                                  |                                      |                                             |                                             | Mask1                                                          | Mask2                                                  | Mask3                                              |                                                          |
| Particles (N)                                    | 174,356                              | -                                           | 364,331                                     | 169,681                                                        | 364,331                                                | 213,944                                            | 54,395                                                   |
| Box size (pix)                                   | 360                                  | 360                                         | 360                                         | 360                                                            | 360                                                    | 360                                                | 360                                                      |
| Map sharpening                                   |                                      |                                             |                                             | -                                                              |                                                        | -                                                  |                                                          |
| B-factor (Å <sup>2</sup> )                       | -116.8                               | -                                           | -119.1                                      | 106.3                                                          | -117.3                                                 | 121.3                                              | -118.5                                                   |
| Resolution (global, Å)                           | 3.2                                  | -                                           | 2.9                                         | 3.16                                                           | 2.85                                                   | 3.05                                               | 3.24                                                     |
| Resolution range<br>(local, Å)                   | 2.7-9.1                              | -                                           | 2.4-7.8                                     | 2.6-9.0                                                        | 2.4-8.5                                                | 2.6-8.6                                            | 2.7-9.5                                                  |
| FSC threshold                                    | 0.143                                | -                                           | 0.143                                       | 0.143                                                          | 0.143                                                  | 0.143                                              | 0.143                                                    |
| <b>Model composition</b>                         |                                      |                                             |                                             |                                                                |                                                        |                                                    |                                                          |
| Protein residues (N)                             | 8,076                                | 8,600                                       |                                             |                                                                |                                                        |                                                    |                                                          |
| Zn ions (N)                                      | 4                                    | 6                                           |                                             |                                                                |                                                        |                                                    |                                                          |
| <b>Refinement</b>                                |                                      |                                             |                                             |                                                                |                                                        |                                                    |                                                          |
| Resolution (Å)                                   | 3.4                                  | 3.3                                         |                                             |                                                                |                                                        |                                                    |                                                          |
| FSC threshold                                    | 0.5                                  | 0.5                                         |                                             |                                                                |                                                        |                                                    |                                                          |
| Model to map (CC)                                | 0.78                                 | 0.81                                        |                                             |                                                                |                                                        |                                                    |                                                          |
| <b>B factors (Å<sup>2</sup>)</b>                 |                                      |                                             |                                             |                                                                |                                                        |                                                    |                                                          |
| Protein residues                                 | -79.1                                | -62.9                                       |                                             |                                                                |                                                        |                                                    |                                                          |
| Ligands                                          | -205.5                               | -184.5                                      |                                             |                                                                |                                                        |                                                    |                                                          |
| <b>RMS deviation</b>                             |                                      |                                             |                                             |                                                                |                                                        |                                                    |                                                          |
| Bond lengths (Å)                                 | 0.004                                | 0.005                                       |                                             |                                                                |                                                        |                                                    |                                                          |
| Bond angles (°)                                  | 0.642                                | 1.008                                       |                                             |                                                                |                                                        |                                                    |                                                          |
| <b>Validation</b>                                |                                      |                                             |                                             |                                                                |                                                        |                                                    |                                                          |
| Clashscore,<br>all atoms                         | 12                                   | 11                                          |                                             |                                                                |                                                        |                                                    |                                                          |
| Rotamer outliers (%)                             | 2.3                                  | 0.8                                         |                                             |                                                                |                                                        |                                                    |                                                          |
| <b>Ramachandran plot</b>                         |                                      |                                             |                                             |                                                                |                                                        |                                                    |                                                          |
| Favoured (%)                                     | 97.4                                 | 96.9                                        |                                             |                                                                |                                                        |                                                    |                                                          |
| Allowed (%)                                      | 2.60                                 | 3.11                                        |                                             |                                                                |                                                        |                                                    |                                                          |
| Outliers (%)                                     | 0                                    | 0.02                                        |                                             |                                                                |                                                        |                                                    |                                                          |
| <b>Deposition</b>                                |                                      |                                             |                                             |                                                                |                                                        |                                                    |                                                          |
| PDB ID                                           | 8PKP                                 | 9GAW                                        |                                             |                                                                |                                                        |                                                    |                                                          |
| EMDB ID                                          | EMD-17751                            | EMD-51190                                   | EMD-13931                                   | EMD-13932                                                      | EMD-13933                                              | EMD-51070                                          | EMD-19711                                                |

**Supplementary Table 2. Rebuilt regions of APC/C<sup>CDH1:EMI1</sup> subunits PDB: 9GAW**

| Subunit         | Residue range                       | Modification                                           | Comments                                                   | 4ul9                |
|-----------------|-------------------------------------|--------------------------------------------------------|------------------------------------------------------------|---------------------|
| APC1            | 135-145                             | Loop refitted                                          |                                                            |                     |
|                 | 192-206                             | Loop refitted                                          |                                                            |                     |
|                 | 275-283                             | Rebuild                                                |                                                            |                     |
|                 | 282-295                             | $\alpha$ -helix to loop<br>Helix now Cdh1 <sup>N</sup> |                                                            |                     |
|                 | 415-424                             | Loop fitted                                            |                                                            |                     |
|                 | 460-464                             | Loop fitted                                            |                                                            |                     |
|                 | 646-650                             | Loop rebuilt                                           |                                                            |                     |
|                 | 671-681                             | $\alpha$ -helix built                                  |                                                            |                     |
|                 | 701-734                             | Build                                                  |                                                            | SC unassigned       |
|                 | 741-757                             | Build                                                  |                                                            |                     |
|                 | 814-838                             | Build                                                  |                                                            |                     |
|                 | 853-859                             | Build                                                  |                                                            |                     |
|                 | 882-901                             | Build                                                  |                                                            |                     |
|                 | 1009-1013                           | Build                                                  |                                                            |                     |
|                 | 1333-1347                           | Build                                                  |                                                            |                     |
|                 | 1433-1452                           | Build                                                  |                                                            |                     |
|                 | 1673-1684                           | Rebuild                                                |                                                            |                     |
|                 | 1711-1734                           | Rebuild/build                                          |                                                            |                     |
|                 | 1734-1911                           | Renumber -3                                            |                                                            |                     |
|                 | 1825-1839                           | Build                                                  |                                                            |                     |
| 1873-1877       | Build                               |                                                        |                                                            |                     |
| 1897-1911       | Build                               |                                                        |                                                            |                     |
| 1897-1936       | Rebuild                             |                                                        |                                                            |                     |
| 1911-1935       | Reverse chain<br>polarity, fit s.c. |                                                        |                                                            |                     |
| APC2            | 17-35                               | s.c. built to $\alpha$ -helix                          |                                                            | 15-28, m.c.<br>only |
|                 | 46-52                               | Build                                                  |                                                            |                     |
|                 | 53-87                               | Rebuild and fit s.c.                                   |                                                            |                     |
|                 | 126-147                             | Fit s.c.                                               |                                                            | Poly A              |
|                 | 187-233                             | Build/rebuild, fit s.c.                                | New Zn-binding<br>module built:<br>Cys 221,224,<br>231,233 |                     |
|                 | 304-322                             | Loop fitted                                            |                                                            |                     |
|                 | 458-507                             | Rebuild                                                |                                                            |                     |
|                 | 605-640 (CTD)                       |                                                        | Good density                                               |                     |
|                 | 644-659 (CTD)                       |                                                        | $\beta$ -hairpin no<br>density                             |                     |
|                 | 660-716 (CTD)                       | m.c. good, s.c. poorly<br>defined                      | Only poor part<br>of APC2                                  |                     |
| APC3(B) chain P | 171-176                             | Build                                                  |                                                            |                     |
|                 | 177-445                             |                                                        | Long<br>disordered<br>region                               |                     |
|                 | 446-450                             | Build                                                  |                                                            |                     |
| APC3(A) chain J | 2-4                                 | Build                                                  |                                                            |                     |
|                 | 171-176                             | Build                                                  |                                                            |                     |
|                 | 177-445                             |                                                        | Long<br>disordered<br>region                               |                     |
|                 | 446-450                             | Build                                                  |                                                            |                     |
|                 | 767-780                             | Rebuild                                                |                                                            |                     |
| APC4            | 126-133                             | Loop fitted                                            |                                                            |                     |



|                  |           |                                     |                            |                                                |
|------------------|-----------|-------------------------------------|----------------------------|------------------------------------------------|
|                  | 276-301   | Rebuild                             |                            |                                                |
|                  | 430-439   | Loop fitted                         |                            |                                                |
|                  | 465-470   | Loop fitted                         |                            |                                                |
|                  | 487-495   | Rebuild                             |                            |                                                |
| APC5             | 9-27      | Build                               |                            |                                                |
|                  | 46-55     | Rebuild                             |                            |                                                |
|                  | 351-357   | Rebuild                             |                            |                                                |
|                  | 742-755   | Rebuild                             |                            |                                                |
| APC6(A) chain Q  | No change |                                     |                            |                                                |
| APC6(B) chain K  | 94-98     | Build                               |                            |                                                |
|                  | 120-128   | Build                               |                            |                                                |
|                  | 544-567   | Build: fit s.c.<br>assigned to APC6 |                            | Poly A,<br>unassigned<br>chain                 |
| APC7(A) chain Y  | 34-35     | Build                               |                            |                                                |
|                  | 553-555   | Build                               |                            |                                                |
| APC7(B) chain Z  | 34-35     | Build                               |                            |                                                |
|                  | 131       | Build                               |                            |                                                |
|                  | 111-122   | Build                               |                            |                                                |
|                  | 371-540   | Reposition $\alpha$ -helices        |                            |                                                |
| APC8(A) chain U  | 499-509   | Loop fitted                         |                            |                                                |
|                  | 504-523   | Rebuild                             |                            |                                                |
| APC8(B) chain V  | 499-509   | Loop fitted                         |                            |                                                |
| APC10            | 167-176   | Rebuild, s.c. fitted                |                            |                                                |
| APC11            | 1-8       | Build $\beta$ -strand               |                            |                                                |
|                  | 18-84     | RING domain                         | m.c. and s.c.:<br>good fit |                                                |
| APC12(A) chain G | 26-27     | Build                               |                            |                                                |
| APC12(B) chain W | 26        | Build                               |                            |                                                |
| APC13            | 1-6       | Rebuild                             |                            |                                                |
|                  | 39-47     | Build                               |                            |                                                |
|                  | 68        | Build                               |                            |                                                |
| APC15            | No change |                                     |                            |                                                |
| APC16            | 51-57     | Rebuild                             |                            |                                                |
|                  | 108       | Build                               |                            |                                                |
| CDH1             | 1-17      | Build as $\alpha$ -helix            |                            | $\alpha$ -helix<br>assigned to<br>APC1 284-295 |
|                  | 144-145   | Build                               |                            |                                                |
|                  | 164-172   | Build                               | Connects to<br>WD40        |                                                |
|                  | 473-476   | Rebuild                             |                            |                                                |
| EMI1             | 117-121   | Build                               | KEN-box                    |                                                |
|                  |           | ZBR domain 356-415                  | m.c. and s.c.:<br>good fit |                                                |
|                  | 433-447   | Fit s.c.                            | Includes LRRL              |                                                |

**Supplementary Table 3. Ordered and disordered regions of APC/C subunits**

| Subunit                        | Visible N-term | Visible C-term | Disordered regions                                                                                                                      | <sup>6</sup> AF2 C-term helix | Protein Length (N) |
|--------------------------------|----------------|----------------|-----------------------------------------------------------------------------------------------------------------------------------------|-------------------------------|--------------------|
| APC1                           | 10             | 1936           | 51-70, 195-204, 228-233, 284-399 (AI segment), 516-581, 682-700, 735-741, 902-921, 987-1010, 1336-1346, 1439-1451, 1902-1907, 1937-1944 |                               | 1944               |
| APC2                           | 17             | 716            | 35-48, 307-317, 461-474, 463-470, 488-495, 646-657, 707-711, 717-822 (WHB domain)                                                       |                               | 822                |
| <sup>1,2</sup> APC3(A) chain J | 3              | 780            | 172-450, 781-824                                                                                                                        | 783                           | 824                |
| <sup>1,2</sup> APC3(B) chain P | 5              | 769            | 174-447, 770-824                                                                                                                        | 783                           | 824                |
| APC4                           | 3              | 755            | 128-133, 431-437, 458-468, 756-808                                                                                                      |                               | 808                |
| APC5                           | 9              | 755            | 20-25, 168-204 (linker), 453-457                                                                                                        |                               | 755                |
| <sup>3,4</sup> APC6(A) chain Q | 1              | 533            | 96-123 (AF2 $\alpha$ -helix 99-109), 534-630                                                                                            | 528                           | 620                |
| <sup>3</sup> APC6(B) chain K   | 1              | 565            | 99-126 (AF2 $\alpha$ -helix 99-109), 528-544, 566-620                                                                                   | 528                           | 620                |
| APC7(A) chain Y                | 35             | 540            | 111-131, 541-565, AF2 $\alpha$ -helix 3-23 not visible                                                                                  | 557                           | 565                |
| APC7(B) chain Z                | 35             | 507            | 111-130, 508-565, AF2 $\alpha$ -helix 3-23 not visible                                                                                  | 557                           | 565                |
| <sup>5</sup> APC8(A) chain U   | 25             | 523            | 136-144, 524-59                                                                                                                         | 559                           | 597                |
| <sup>5</sup> APC8(B) chain V   | 24             | 523            | 523-597                                                                                                                                 | 559                           | 597                |
| APC10                          | 4              | 185            | 164-167                                                                                                                                 |                               | 185                |
| APC11                          | 3              | 83             | 84                                                                                                                                      |                               | 84                 |
| APC12(A) chain W               | 1              | 26             | 27-85                                                                                                                                   |                               | 85                 |
| APC12(B) chain G               | 1              | 26             | 27-85                                                                                                                                   |                               | 85                 |
| APC13                          | 1              | 68             | 42-45, 69-74                                                                                                                            |                               | 74                 |
| APC15                          | 2              | 57             | 58-121                                                                                                                                  |                               | 121                |
| APC16                          | 51             | 108            | 1-50, 109-110                                                                                                                           |                               | 110                |
| CDH1                           | 1              | 496            | 14-41, 68-87, 110-122, 134-142, 416-434                                                                                                 |                               | 496                |
| EMI1                           | 116            | 447            | 1-115, 123-319, 335-357, 416-434                                                                                                        |                               | 447                |

Notes

<sup>1</sup>Different trajectory N-term of IR tail for CDH1 and APC10

<sup>2</sup>Residues 273-286 of APC3 insert predicted to bind IR-tail binding site of APC3, includes T<sup>279</sup>P

<sup>3</sup>AF2: In free APC6, residues 596-620 of APC6 mimic residues 1-27 of APC12

<sup>4</sup>Residues 529-540 of APC6(A) chain Q interacts with APC8(A) chain U

<sup>5</sup>AF2: Residues 587-C-term of APC8 binds to C-box/IR tail site of APC8

<sup>6</sup>C-terminal residue of an AF2-predicted  $\alpha$ -helix.

N-term and C-term residues of sequence

## Supplementary References

- 1 Pintilie, G. *et al.* Measurement of atom resolvability in cryo-EM maps with Q-scores. *Nature methods* **17**, 328-334, doi:10.1038/s41592-020-0731-1 (2020).
