# Supplementary material for: Cryo-EM structures of apo-APC/C and APC/CCDH1:EMI1 complexes provide insights into APC/C regulation
Source: PubMed Central journal article supplement (PMC11579458; doi:10.1038/s41467-024-54398-5), 2024-11-21
Supplement: 41467_2024_54398_MOESM2_ESM.pdf [file 41467_2024_54398_MOESM2_ESM.pdf]

## Description of Additional Supplementary files

**Supplementary Movie 1:** Video shows conformational change on transition from apo-APC/C to the APC/C<sup>CDH1:EMI1</sup> ternary complex. Apo-APC/C and APC/C<sup>CDH1:EMI1</sup> were superimposed on APC1<sup>PC</sup>.
